# Supplementary material for: HPLC and LC–MS/MS-Based Quantitative Characterization of Related Substances Associated with Sotalol Hydrochloride
Source: MDPI journal article supplement (doi:10.3390/molecules29030588), 2024-01-25
Supplement: s1 [file s1]

# **HPLC and LC–MS/MS-Based Quantitative Characterization of Related Substances Associated with Sotalol Hydrochloride**

**Pengyan Zhu<sup>1,2,†</sup>, Xiaojing Shen<sup>1,2,†</sup>, Xinting Wang<sup>2,3</sup>, Xinlan Liu<sup>2,3</sup>,  
Yingshuang Zhang<sup>1</sup>, Ke Wang<sup>1</sup>, Wenfen Gao<sup>4</sup>, Xuanjun Wang<sup>5,\*</sup>  
and Wenjuan Yuan<sup>1,2,\*</sup>**

<sup>1</sup> College of Science, Yunnan Agricultural University, Kunming 650201, China; zhupengyan16@163.com (P.Z.); 2013017@ynau.edu.cn (X.S.); 15559792790@163.com (Y.Z.); 13118788175@163.com (K.W.)

<sup>2</sup> Key Laboratory of Puer Tea Science, Ministry of Education, Yunnan Agricultural University, Kunming 650201, China; 18787628093@163.com (X.W.); liuxinlan15@163.com (X.L.)

<sup>3</sup> College of Food Science and Technology, Yunnan Agricultural University, Kunming 650201, China

<sup>4</sup> Yunnan Institute for Food and Drug Control, Kunming 650201, China; 19187160596@163.com

<sup>5</sup> Yunnan Key Laboratory of Southern Medicinal Resource, School of Chinese Materia Medica, Yunnan University of Chinese Medicine, Kunming 650500, China

\* Correspondence: jwang@ynau.edu.cn (X.W.); yuanwj0805@126.com (W.Y.); Tel./Fax: +86-871-6522-6191 (W.Y.)

† These authors contributed equally to this work.

### Supporting information

Figure S1 The purity of **RS1**, **RS2** and **RS3** was detected by HPLC

Figure S2 Linear relationships of **STHCL**, **RS1**, **RS2**, **RS3**

Figure S3 HRESIMS spectrum of **STHCL**

Figure S4.1  $^1\text{H}$  NMR spectrum of **RS1** in  $\text{CD}_3\text{OD}$

Figure S4.2  $^{13}\text{C}$  NMR and dept spectrum of **RS1** in  $\text{CD}_3\text{OD}$

Figure S4.3 HRESIMS spectrum of **RS1**

Figure S5.1  $^1\text{H}$  NMR spectrum of **RS2** in  $\text{CD}_3\text{OD}$

Figure S5.2  $^{13}\text{C}$  NMR and dept spectrum of **RS2** in  $\text{CD}_3\text{OD}$

Figure S5.3 HRESIMS spectrum of **RS2**

Figure S6.1  $^1\text{H}$  NMR spectrum of **RS3** in  $\text{CDCl}_3$

Figure S6.2  $^{13}\text{C}$  NMR and dept spectrum of **RS3** in  $\text{CDCl}_3$

Figure S6.3 HRESIMS spectrum of **RS3**

**Figure S1. The purity of RS1, RS2 and RS3 was detected by HPLC**

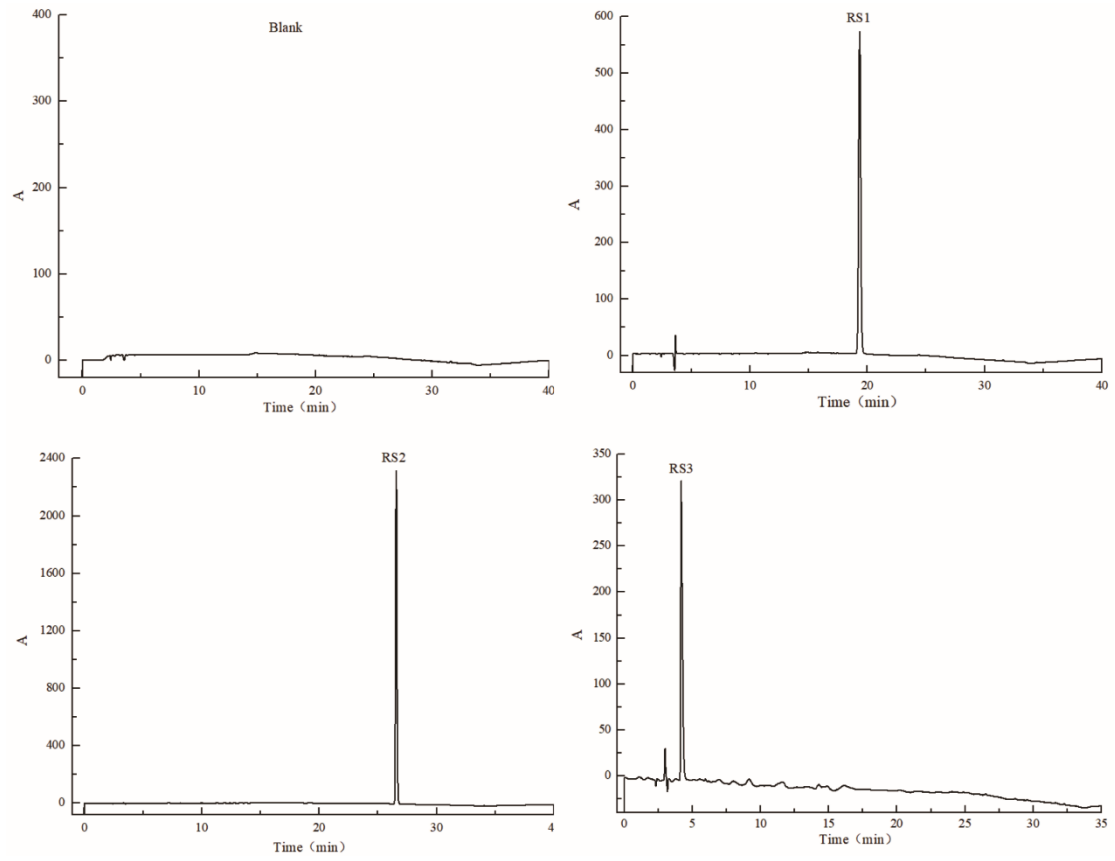

**Figure S2. Linear relationships of STHCL, RS1, RS2, RS3**

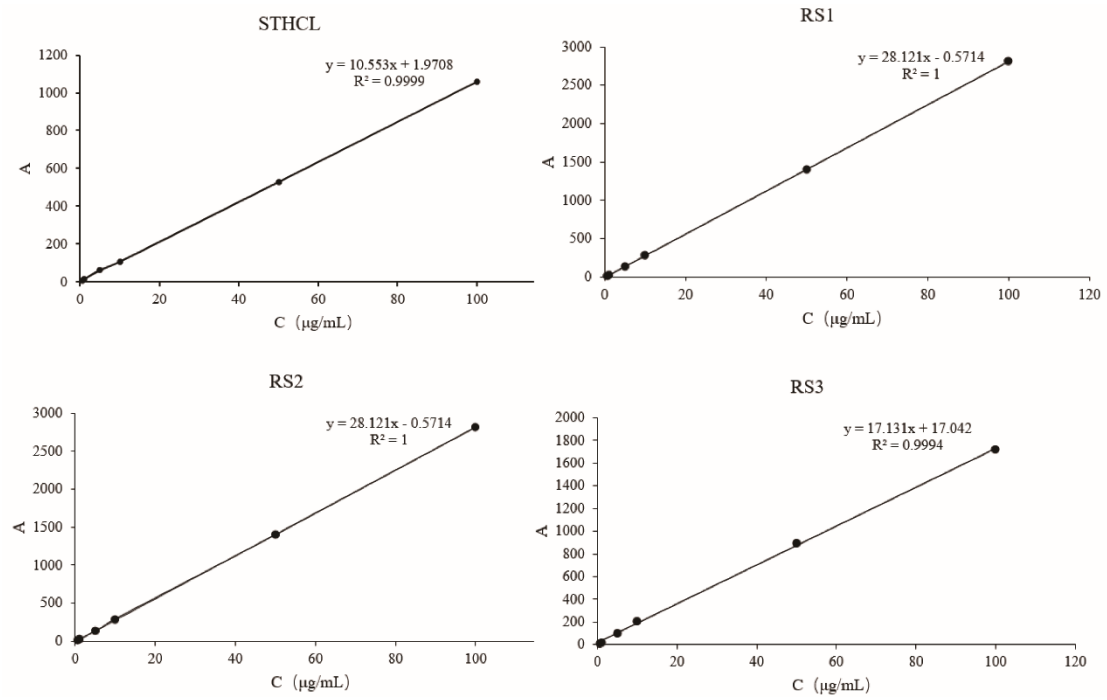

# Figure S3 HRESIMS spectrum of STHCL

## Qualitative Analysis Report

|                        |                             |               |                      |
|------------------------|-----------------------------|---------------|----------------------|
| Data Filename          | STHCL.d                     | Sample Name   | STHCL                |
| Sample Type            | Sample                      | Position      | P1-B1                |
| Instrument Name        | Instrument 1                | User Name     |                      |
| Acq Method             | s.m                         | Acquired Time | 8/22/2022 4:42:21 PM |
| IRM Calibration Status | Success                     | DA Method     | PCDL.m               |
| Comment                |                             |               |                      |
| Sample Group           | Info.                       |               |                      |
| Acquisition SW         | 6200 series TOF/6500 series |               |                      |
| Version                | Q-TOF B.05.01 (B5125.2)     |               |                      |

## User Spectra

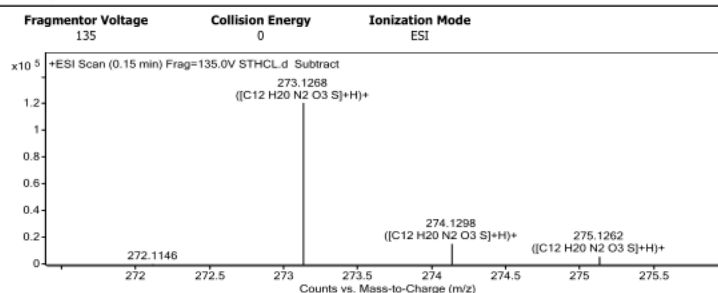

## Peak List

| m/z      | z | Abund    | Formula                                                         | Ion                |
|----------|---|----------|-----------------------------------------------------------------|--------------------|
| 255.1161 | 1 | 51613.22 |                                                                 |                    |
| 256.1186 | 1 | 5509.75  |                                                                 |                    |
| 271.1111 | 1 | 8149.53  |                                                                 |                    |
| 273.1268 | 1 | 120986.8 | C <sub>12</sub> H <sub>20</sub> N <sub>2</sub> O <sub>3</sub> S | (M+H) <sup>+</sup> |
| 274.1298 | 1 | 15877.07 | C <sub>12</sub> H <sub>20</sub> N <sub>2</sub> O <sub>3</sub> S | (M+H) <sup>+</sup> |
| 275.1262 | 1 | 6431.93  | C <sub>12</sub> H <sub>20</sub> N <sub>2</sub> O <sub>3</sub> S | (M+H) <sup>+</sup> |
| 701.4951 | 1 | 18975.58 |                                                                 |                    |
| 702.4977 | 1 | 6812.53  |                                                                 |                    |
| 814.5796 | 1 | 13586.98 |                                                                 |                    |
| 815.5827 | 1 | 6741.11  |                                                                 |                    |

## Formula Calculator Element Limits

| Element | Min | Max |
|---------|-----|-----|
| C       | 3   | 60  |
| H       | 0   | 120 |
| O       | 0   | 30  |
| N       | 0   | 3   |
| S       | 0   | 3   |

## Formula Calculator Results

| Formula                                                         | CalculatedMass | CalculatedMz | Mz       | Diff. (mDa) | Diff. (ppm) | DBE    |
|-----------------------------------------------------------------|----------------|--------------|----------|-------------|-------------|--------|
| C <sub>12</sub> H <sub>20</sub> N <sub>2</sub> O <sub>3</sub> S | 272.1195       | 273.1267     | 273.1268 | -0.10       | -0.37       | 4.0000 |

--- End Of Report ---

Figure S4.1  $^1\text{H}$  NMR spectrum of RS1 in  $\text{CD}_3\text{OD}$

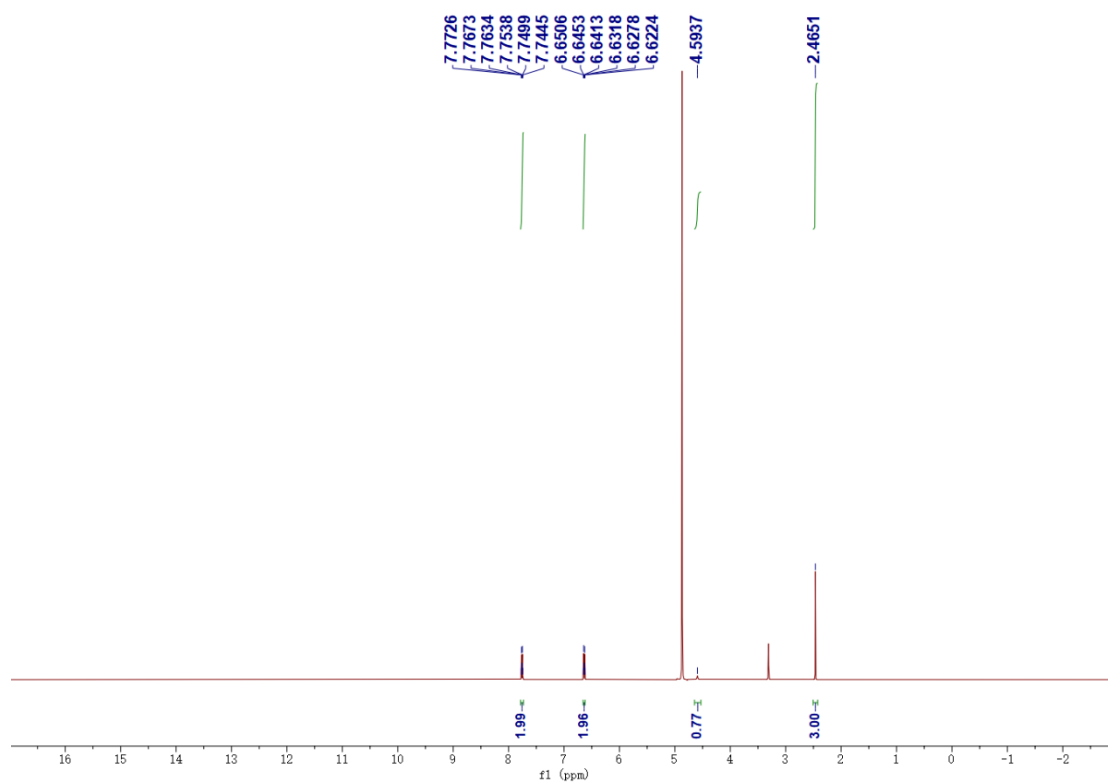

Figure S4.2  $^{13}\text{C}$  NMR spectrum of RS1 in  $\text{CD}_3\text{OD}$

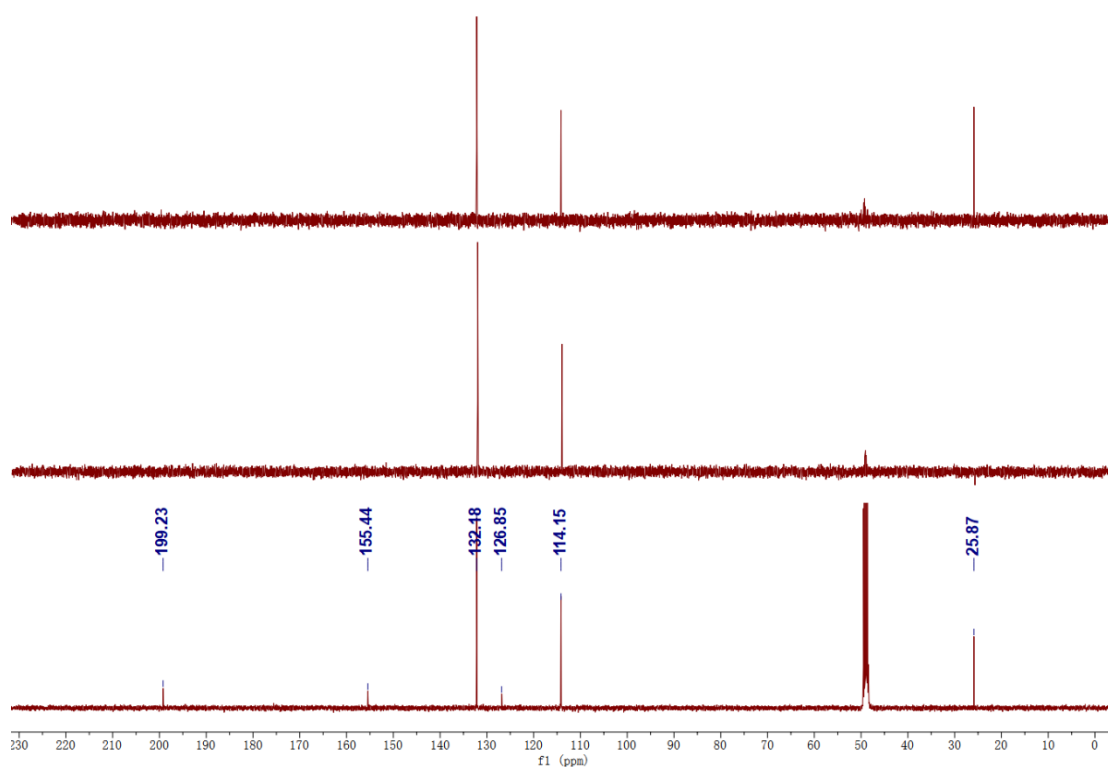

# Figure S4.3 HRESIMS spectrum of RS1

## Qualitative Analysis Report

|                               |              |                      |                      |
|-------------------------------|--------------|----------------------|----------------------|
| <b>Data Filename</b>          | RS1.d        | <b>Sample Name</b>   | RS1                  |
| <b>Sample Type</b>            | Sample       | <b>Position</b>      | P1-B2                |
| <b>Instrument Name</b>        | Instrument 1 | <b>User Name</b>     |                      |
| <b>Acq Method</b>             | s.m          | <b>Acquired Time</b> | 8/22/2022 4:43:32 PM |
| <b>IRM Calibration Status</b> | Success      | <b>DA Method</b>     | PCDL.m               |
| <b>Comment</b>                |              |                      |                      |

|                       |                             |              |
|-----------------------|-----------------------------|--------------|
| <b>Sample Group</b>   |                             | <b>Info.</b> |
| <b>Acquisition SW</b> | 6200 series TOF/6500 series |              |
| <b>Version</b>        | Q-TOF B.05.01 (B5125.2)     |              |

## User Spectra

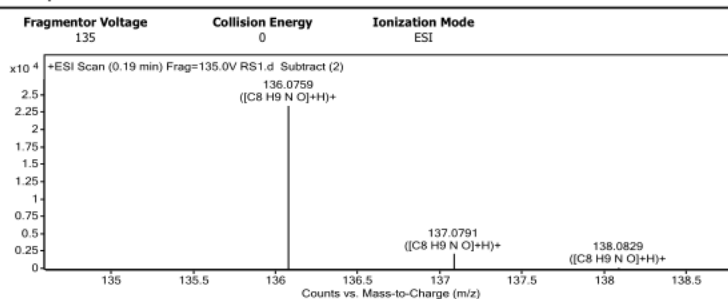

## Peak List

| m/z      | z | Abund    | Formula   | Ion    |
|----------|---|----------|-----------|--------|
| 136.0759 | 1 | 23525.47 | C8 H9 N O | (M+H)+ |
| 158.0578 | 1 | 8511.72  |           |        |
| 349.184  | 1 | 3729.81  |           |        |
| 393.2096 | 1 | 3115.03  |           |        |
| 437.2353 | 1 | 2878.5   |           |        |
| 588.41   | 1 | 3202.58  |           |        |
| 701.495  | 1 | 9609.03  |           |        |
| 702.5003 | 1 | 4550.32  |           |        |
| 814.5789 | 1 | 7417.28  |           |        |
| 815.5824 | 1 | 4182.02  |           |        |

## Formula Calculator Element Limits

| Element | Min | Max |
|---------|-----|-----|
| C       | 3   | 60  |
| H       | 0   | 120 |
| O       | 0   | 30  |
| N       | 0   | 3   |
| S       | 0   | 3   |

## Formula Calculator Results

| Formula   | CalculatedMass | CalculatedMz | Mz       | Diff. (mDa) | Diff. (ppm) | DBE    |
|-----------|----------------|--------------|----------|-------------|-------------|--------|
| C8 H9 N O | 135.0684       | 136.0757     | 136.0759 | -0.20       | -1.47       | 5.0000 |

--- End Of Report ---

Figure S5.1  $^1\text{H}$  NMR spectrum of RS2 in  $\text{CD}_3\text{OD}$

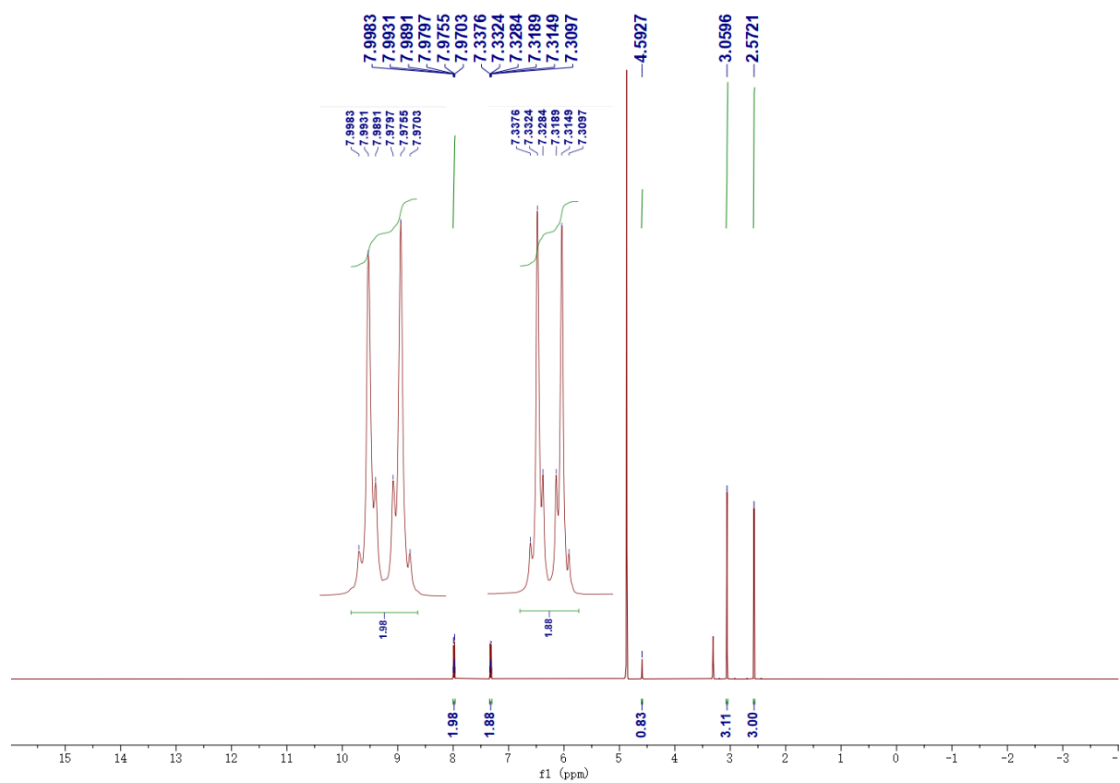

Figure S5.2  $^{13}\text{C}$  NMR spectrum of RS2 in  $\text{CD}_3\text{OD}$

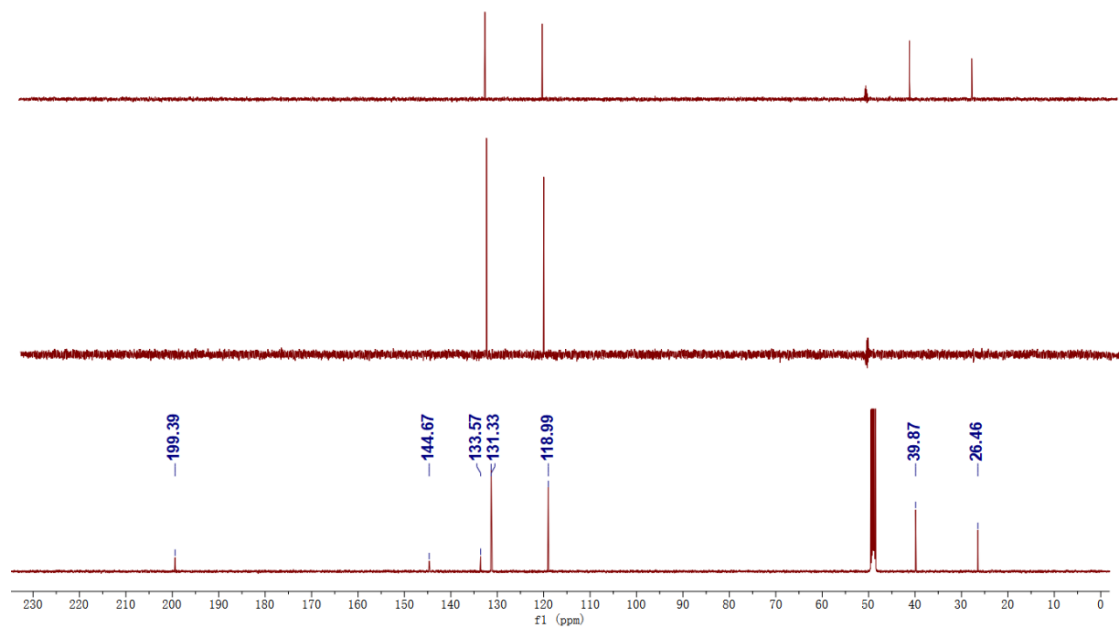

# Figure S5.3 HRESIMS spectrum of RS2

## Qualitative Analysis Report

|                               |                             |                      |                      |
|-------------------------------|-----------------------------|----------------------|----------------------|
| <b>Data Filename</b>          | RS2-.d                      | <b>Sample Name</b>   | RS2                  |
| <b>Sample Type</b>            | Sample                      | <b>Position</b>      | P1-B3                |
| <b>Instrument Name</b>        | Instrument 1                | <b>User Name</b>     |                      |
| <b>Acq Method</b>             | s-.m                        | <b>Acquired Time</b> | 8/22/2022 4:49:48 PM |
| <b>IRM Calibration Status</b> | Success                     | <b>DA Method</b>     | PCDL.m               |
| <b>Comment</b>                |                             |                      |                      |
| <b>Sample Group</b>           | Info.                       |                      |                      |
| <b>Acquisition SW</b>         | 6200 series TOF/6500 series |                      |                      |
| <b>Version</b>                | Q-TOF B.05.01 (B5125.2)     |                      |                      |

### User Spectra

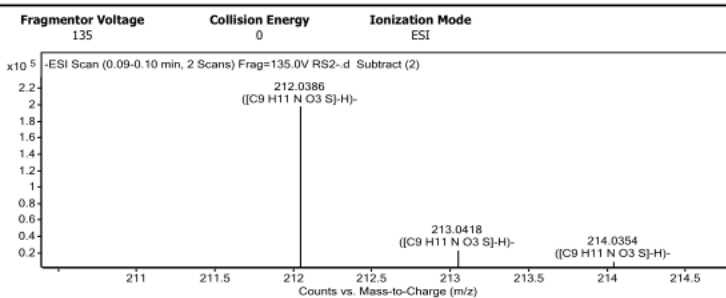

### Peak List

| m/z      | z | Abund     | Formula       | Ion    |
|----------|---|-----------|---------------|--------|
| 133.0529 | 1 | 5192.46   |               |        |
| 134.0605 | 1 | 6864.87   |               |        |
| 212.0386 | 1 | 198340.78 | C9 H11 N O3 S | (M-H)- |
| 213.0418 | 1 | 24395.58  | C9 H11 N O3 S | (M-H)- |
| 214.0354 | 1 | 10774.88  | C9 H11 N O3 S | (M-H)- |
| 297.0161 | 1 | 5272.23   |               |        |
| 348.0136 | 1 | 4083.97   |               |        |
| 447.0662 | 1 | 11666.21  |               |        |
| 471.2747 | 1 | 12397.93  |               |        |
| 472.2783 | 1 | 3433.79   |               |        |

### Formula Calculator Element Limits

| Element | Min | Max |
|---------|-----|-----|
| C       | 3   | 60  |
| H       | 0   | 120 |
| O       | 0   | 30  |
| N       | 0   | 3   |
| S       | 0   | 3   |

### Formula Calculator Results

| Formula       | CalculatedMass | CalculatedMz | Mz       | Diff. (mDa) | Diff. (ppm) | DBE    |
|---------------|----------------|--------------|----------|-------------|-------------|--------|
| C9 H11 N O3 S | 213.0460       | 212.0387     | 212.0386 | 0.10        | 0.47        | 5.0000 |

--- End Of Report ---



Figure S6.1  $^1\text{H}$  NMR spectrum of RS3 in  $\text{CDCl}_3$

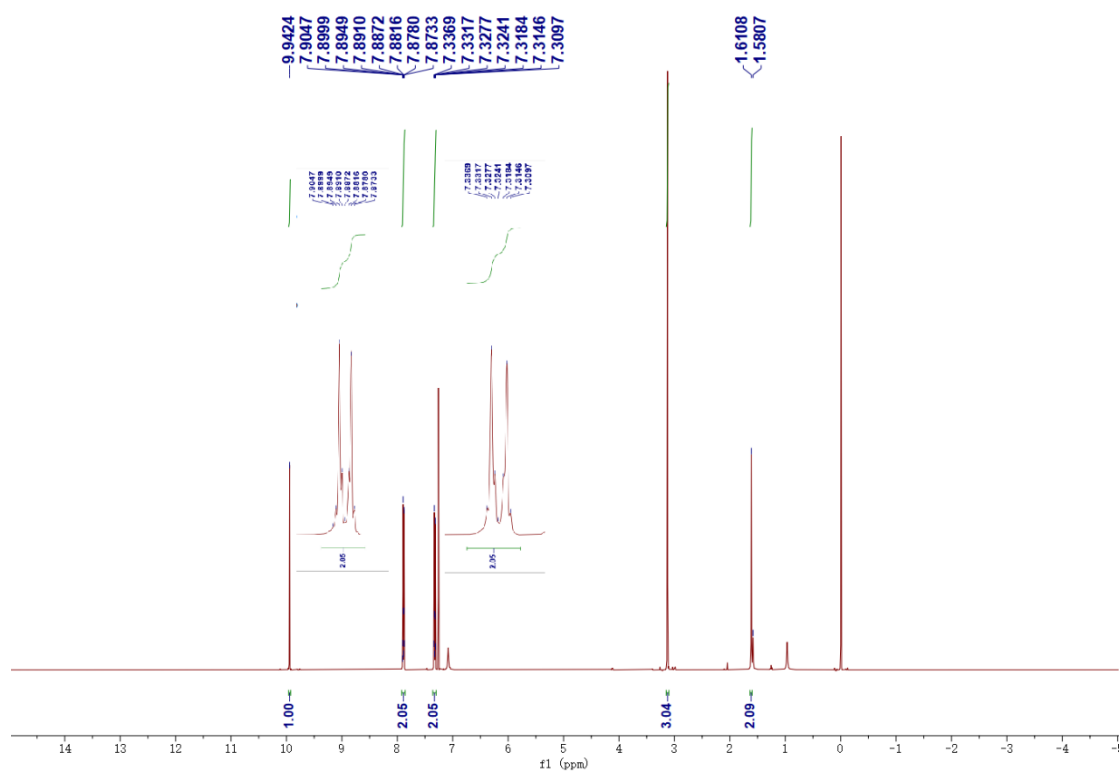

Figure S6.2  $^{13}\text{C}$  NMR spectrum of RS3 in  $\text{CDCl}_3$

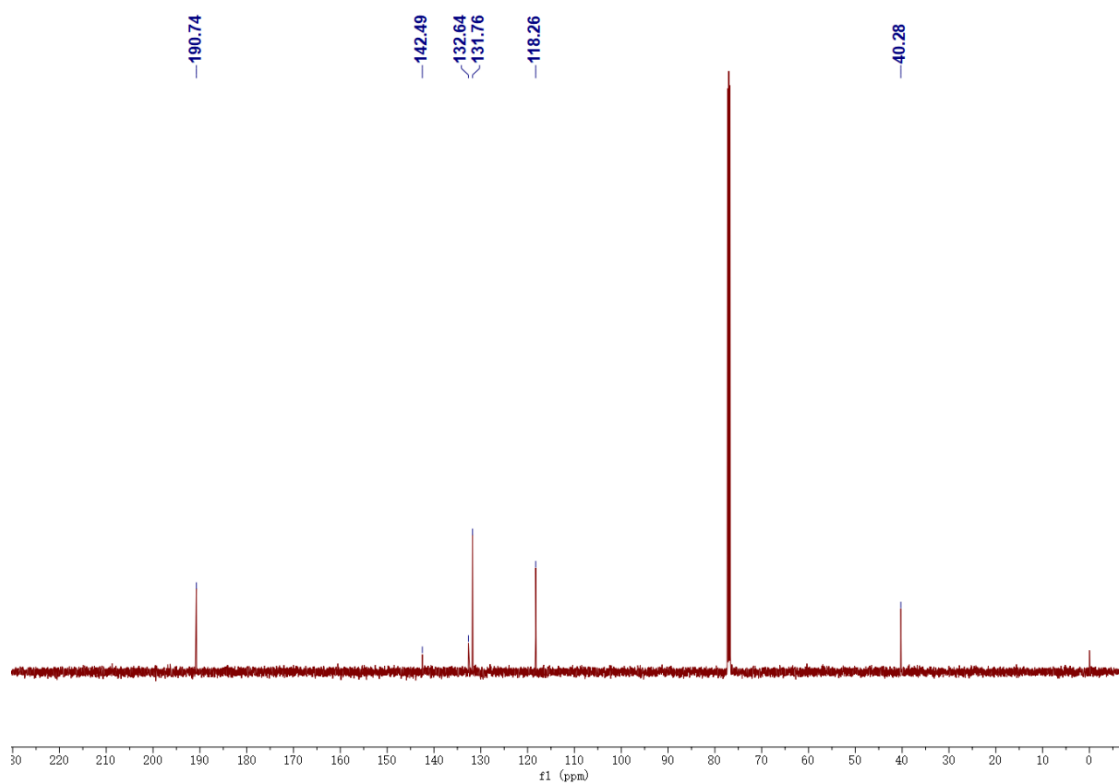

Figure S6.3 HRESIMS spectrum of RS3

## Qualitative Analysis Report

|                               |              |                      |                      |
|-------------------------------|--------------|----------------------|----------------------|
| <b>Data Filename</b>          | RS3-.d       | <b>Sample Name</b>   | RS3                  |
| <b>Sample Type</b>            | Sample       | <b>Position</b>      | P1-B4                |
| <b>Instrument Name</b>        | Instrument 1 | <b>User Name</b>     |                      |
| <b>Acq Method</b>             | s-.m         | <b>Acquired Time</b> | 8/22/2022 4:50:46 PM |
| <b>IRM Calibration Status</b> | Success      | <b>DA Method</b>     | PCDL.m               |
| <b>Comment</b>                |              |                      |                      |

|                               |                                                        |              |
|-------------------------------|--------------------------------------------------------|--------------|
| <b>Sample Group</b>           |                                                        | <b>Info.</b> |
| <b>Acquisition SW Version</b> | 6200 series TOF/6500 series<br>Q-TOF B.05.01 (B5125.2) |              |

### User Spectra

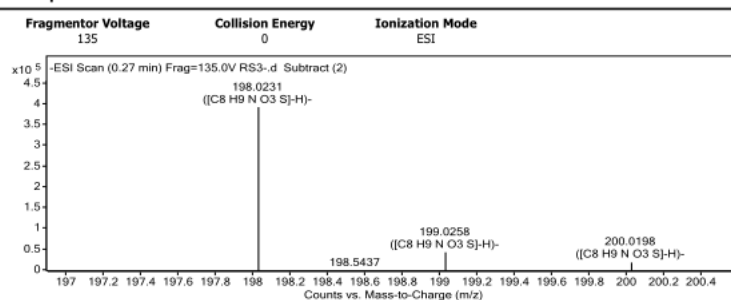

### Peak List

| m/z      | z | Abund     | Formula      | Ion    |
|----------|---|-----------|--------------|--------|
| 120.043  | 1 | 13732.47  |              |        |
| 121.0486 | 1 | 3846.79   |              |        |
| 198.0231 | 1 | 392664.34 | C8 H9 N O3 S | (M-H)- |
| 199.0258 | 1 | 43927.92  | C8 H9 N O3 S | (M-H)- |
| 200.0198 | 1 | 20884.49  | C8 H9 N O3 S | (M-H)- |
| 283.0003 | 1 | 5716.74   |              |        |
| 333.9976 | 1 | 5367.96   |              |        |
| 419.0345 | 1 | 16222.55  |              |        |
| 420.0386 | 1 | 3568.73   |              |        |
| 471.2738 | 1 | 10529.69  |              |        |

### Formula Calculator Element Limits

| Element | Min | Max |
|---------|-----|-----|
| C       | 3   | 60  |
| H       | 0   | 120 |
| O       | 0   | 30  |
| N       | 0   | 3   |
| S       | 0   | 3   |

### Formula Calculator Results

| Formula      | CalculatedMass | CalculatedMz | Mz       | Diff. (mDa) | Diff. (ppm) | DBE    |
|--------------|----------------|--------------|----------|-------------|-------------|--------|
| C8 H9 N O3 S | 199.0303       | 198.0230     | 198.0231 | -0.10       | -0.50       | 5.0000 |

--- End Of Report ---
